# Supplementary material
Source: Elsevier journal article supplement (https://www.sciencedirect.com/science/article/pii/S0300289621000739)
Supplement: mmc1 [file S0300289621000739:mmc1.pdf]

## SUPPLEMENTARY FILES

### Material

Comparison of the amino-acid sequences of the PROE and IGLL1 proteins of pigeons with their homologous proteins in geese and ducks.

Local alignments of the amino-acid sequences of pigeon PROE (XP\_005514568) and IGLL1 (XP\_005503921) proteins were performed against non-redundant (NR) protein sequences from a database of goose and duck taxids using the BLASTp tool. Identity (ID), similarity (SIM), and percentage coverage were used to compare the amino-acid sequences of the pigeon PROE and IGLL1 proteins with their homologous proteins in geese and ducks.

### Results

#### Comparison blast

The PROE amino-acid sequences showed a minimum coverage of 73%, with the percentage of identity ranging from 61 to 81% and the percentage of similarity from 68 to 88% (Table A1, Appendices). The duck PROE protein has an amino acid sequence closer to that of pigeons than geese. The alignments of the IGLL1 amino-acid sequences showed a minimum coverage of 99%, a percentage of identity ranging from 65 to 89%, and a percentage of similarity from 77 to 89% (Table A1, Appendices). The IGLL1 proteins of goose and duck showed highly conserved amino-acid sequences (Coverage: 100%, ID, 81%, SIM: 89%).

Table A1.

| Antigenic Pigeon proteins<br>(Accession Number) | Alignment Pigeon / Goose                                                                              | Alignment Pigeon / Duck                                                                         | Alignment Goose/ Duck                                                             |
|-------------------------------------------------|-------------------------------------------------------------------------------------------------------|-------------------------------------------------------------------------------------------------|-----------------------------------------------------------------------------------|
| Pigeon PROE<br>(XP_005514568)                   | Proproteinase E-like<br>(XP_013056116)<br>ID: 61%<br>SIM: 68%<br>Coverage: 86%                        | Proproteinase E-like<br>(XP_027303168)<br>ID: 81%<br>SIM: 88%<br>Coverage: 88%                  | BLASTp<br>(XP_013056116/<br>XP_027303168)<br>ID: 73%<br>SIM: 74%<br>Coverage: 73% |
| Pigeon IGLL1<br>(XP_005503921)                  | Immunoglobulin light chain V-J-C region<br>(AMS75113); 231 aa<br>ID: 66%<br>SIM: 80%<br>Coverage: 99% | Immunoglobulin lambda light chain<br>(CAA57568); 230 aa<br>ID: 65%<br>SIM: 77%<br>Coverage: 99% | BLASTp<br>(AMS75113/CAA57568)<br>ID: 81%<br>SIM: 89%<br>Coverage: 100%            |

Table A1. Alignment of amino-acid (aa) sequences of pigeon, goose, and duck proteins.

Abbreviations: ID: identity, SIM: similarity. Alignments were conducted using BLASTp tools

freely available at <https://blast.ncbi.nlm.nih.gov/Blast.cgi?PAGE=Proteins>

[Table A2:](#)

|                                                         | Recombinant proteins | AUC [95% CI]     | Threshold index value | Sensitivity (%) [95%CI] | Specificity (%) [95%CI] | P-value (K-test) | PPV (%) | NPV (%) |
|---------------------------------------------------------|----------------------|------------------|-----------------------|-------------------------|-------------------------|------------------|---------|---------|
| <b>Chronic FDL patients vs controls (excluding BFL)</b> | r-PROE               | 0.90 [0.82-0.97] | 0.505                 | 75.0 [55.0-90.0]        | 86.7 [73.3-96.7]        | 3.33e-05         | 78.95   | 83.87   |
|                                                         | r-IGLL1              | 0.80 [0.66-0.92] | 0.325                 | 55.0 [35.0-75.0]        | 93.3 [83.3-100]         | 2.731e-06        | 84.62   | 75.68   |
| <b>Acute FDL patients vs controls (excluding BFL)</b>   | r-PROE               | 0.85 [0.67-1.0]  | 0.615                 | 72.7 [45.5-100]         | 100 [100-100]           | 0.002723         | 100     | 90.91   |
|                                                         | r-IGLL1              | 0.68 [0.43-0.89] | 0.440                 | 36.4 [9.1-63.64]        | 100 [100-100]           | 0.007672         | 100     | 81.08   |

[Table A2:](#) Diagnostic accuracy of serum IgG antibody against r-PROE (Proproteinase E) and r-

IGLL1 (Immunoglobulin lambda-like polypeptide-1) for chronic and acute FDL patients. The

threshold index value was derived from the ROC analysis. PPV, positive predictive value ;

NPV, negative predictive value.

[Figure A1:](#)

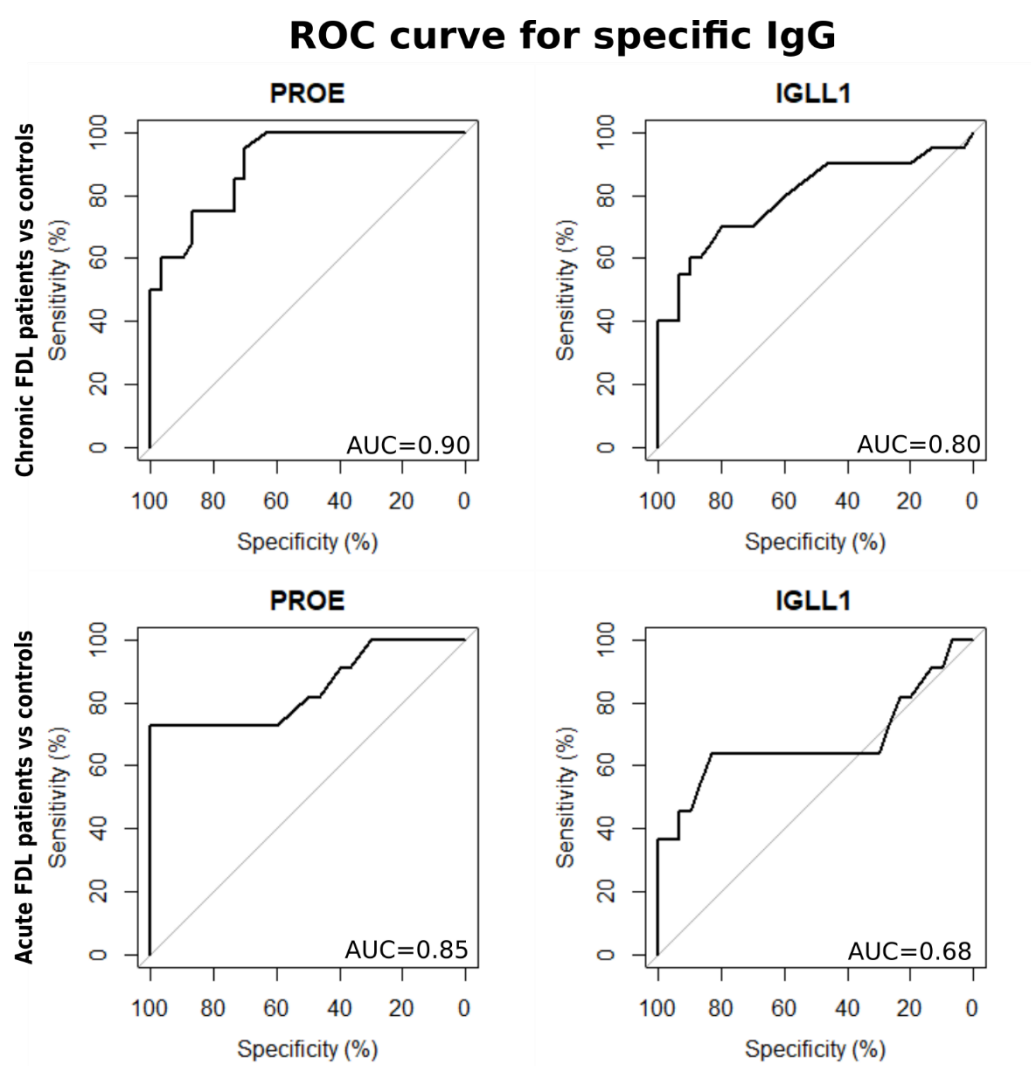

Fig A1 : ROC curves for the titres of serum IgG against r-PROE and r-IGLL1 to compare the index values between patients with chronic and acute FDL and controls.
